# Supplementary material
Source: PubMed Central journal article supplement (PMC6638295)
Supplement: MPP-18-925-s003.pdf [file MPP-18-925-s003.pdf]

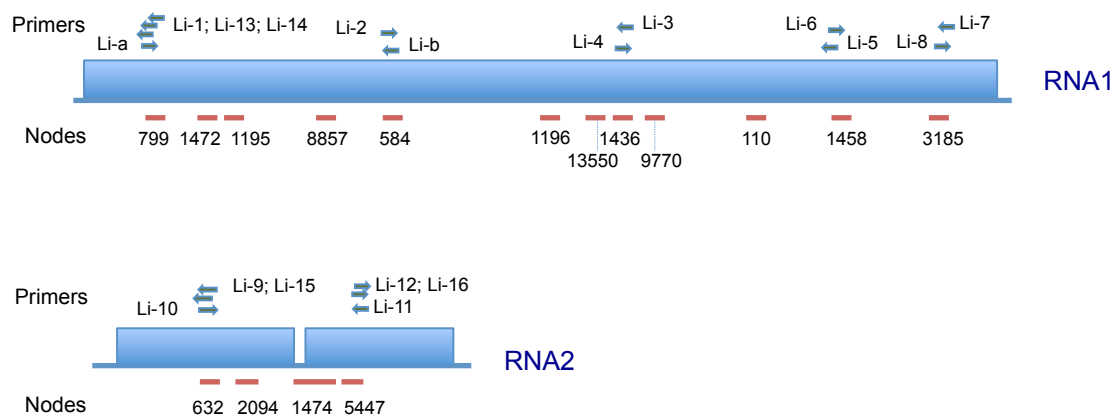

**Figure S1.**

Schematic representation of the relative positions of PrLbAV contigs mapped in the genomic RNAs of RBDV (in blue). Contigs are reported as red lines. Primers designed for the amplification of PrLbAV genomic cDNAs based on this scaffold are indicated by arrows. The sequences of the primers are reported in the Table S1
