# Supplementary material
Source: PubMed Central journal article supplement (PMC6638295)
Supplement: MPP-18-925-s004.pdf [file MPP-18-925-s004.pdf]

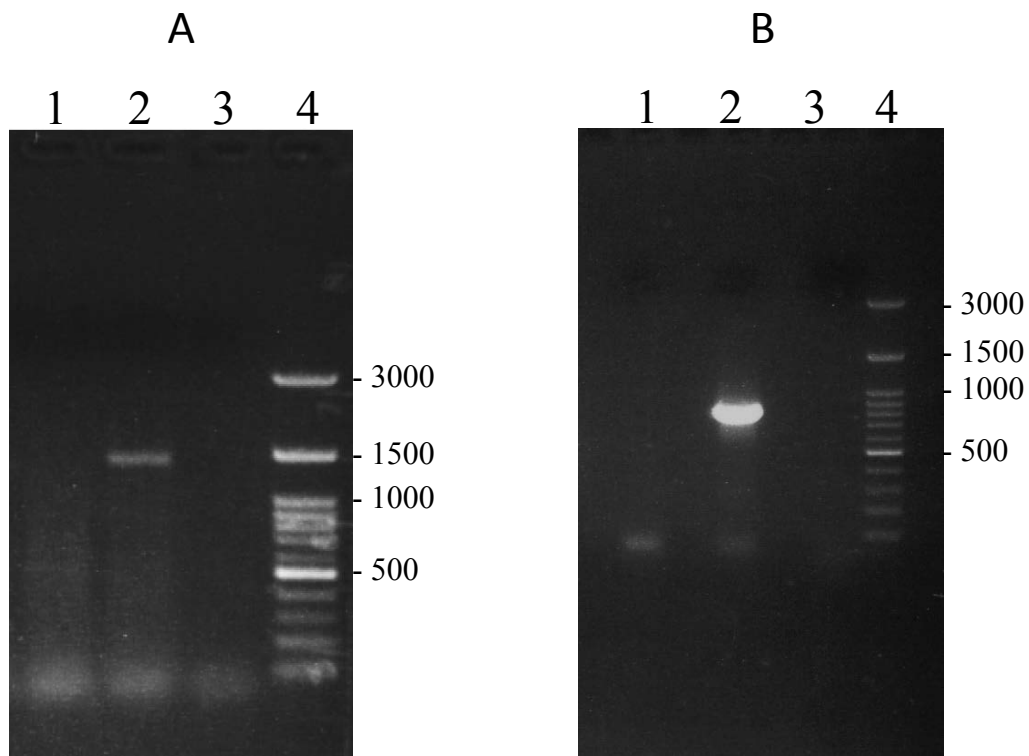

**Figure S2.**

Detection by RT-PCR of RNA1 (**A**) and RNA 2 (**B**) in privet plants. 1, non-symptomatic privet plants; 2, privet plant affected by leaf blotch disease; 3, water control (water instead of RNA has been added to the RT-PCR reaction); 4, DNA molecular weight marker (100 bp ladder, Geneaid Biotech, Taiwan) with sizes (bp) indicated on the right.
