# Supplementary material
Source: PubMed Central journal article supplement (PMC6638295)
Supplement: MPP-18-925-s005.pdf [file MPP-18-925-s005.pdf]

| Virus         | Genus                 | aa position | eee                           | hhhhhhh                                | e                                         | eeeeeeee                          |
|---------------|-----------------------|-------------|-------------------------------|----------------------------------------|-------------------------------------------|-----------------------------------|
| TSWV          | <i>Tospovirus</i>     | 111         | --ANKV                        | KICP---                                | TWD---                                    | SRKQY-----                        |
| RCNMV         | <i>Dianthovirus</i>   | 33          | --GVSE                        | APLIPA---                              | SMMSKITDYA---                             | KTTAK-----                        |
| SBWMV         | <i>Furovirus</i>      | 44          | --RYVE                        | KALTOP---                              | GVVTQMDDAW---                             | TNWTKTNKEEGTPYN-----              |
| CMoV          | <i>Umbravirus</i>     | 42          | --TLHT                        | PLYP---                                | RRQLTLSRFF---                             | SGRWR-----                        |
| CNSV          | <i>Nepovirus B</i>    | 432         | -----                         | VLNRP-----                             | YNALNKLA-----                             | EAGW-----                         |
| RSV           | <i>Tenuivirus</i>     | 88          | -----                         | ATFNILV-----                           | DPYWFHQ-----                              | LTHYFFRVTHYPPFRVETFAMVWIGIKG----- |
| ACLSV         | <i>Tricovirus</i>     | 62          | -----                         | RLASIPVIP-----                         | SSEVQAVL-----                             | RKR-----                          |
| SDV           | <i>Sadwavirus</i>     | 53          | -----                         | QQQDIAIPL-----                         | SSRF-----                                 | GNHQS-----                        |
| PYMoV         | <i>Badnavirus</i>     | 100         | -----                         | NQVDRFTIQ-----                         | EESHKLV-----                              | KSGIKF-----                       |
| CLBV          | <i>Citriovirus</i>    | 55          | -----                         | IKLANILT-----                          | ADRLQSI-----                              | NAKVN-----                        |
| PYFV          | <i>Sequivirus</i>     | 115         | -----                         | RAEITPTA-----                          | ASKLDKTL-----                             | EAHR-----                         |
| RBDV          | <i>Idaeovirus</i>     | 138         | -----                         | GKNEFLV-----                           | ASVFDKLI-----                             | RKDDSP-----                       |
| RRV           | <i>Emaravirus</i>     | 63          | -----                         | KTQLLPISV-----                         | YNEMYKFY-----                             | MHLKQPM-----                      |
| TMV           | <i>Tobamovirus</i>    | 36          | CSKVDK                        | KIMVHENESLSEVNLLKGVK-----              | YNEMYKFY-----                             | LIDSGY-----                       |
| CPsV          | <i>Ophiovirus</i>     | 84          | -----                         | HKKKLLGT-----                          | LKSITDKL-----                             | RKLG-----                         |
| CPMV          | <i>Comovirus</i>      | 204         | -----                         | TVLDIPVTK-----                         | DKTAMAS-----                              | DFIRKE-----                       |
| CiLV-C        | <i>Cilevirus</i>      | 47          | -----                         | RIGVGLFT-----                          | NDMISRLVGF-----                           | INRKAEDAGVRSVESF-----             |
| <b>PrLbAV</b> |                       | 244         | -----                         | PVYIPLV-----                           | ALA-SDIE-----                             | AGE-----                          |
| CRLV          | <i>Cheravirus</i>     | 109         | -----                         | DPYVAVYTPLP-----                       | HITEEQARKLM-----                          | EKGFSN-----                       |
| GFLV          | <i>Nepovirus A</i>    | 118         | -----                         | NTEILYNV-----                          | SEEMEYR-----                              | DRGMSA-----                       |
| OuMV          | <i>Ourmiavirus</i>    | 57          | -----                         | VEDPIALIP-----                         | HGIWSIFKSK-----                           | LAQM-----                         |
| PoLV          | <i>Aureovirus</i>     | 30          | -----                         | TKAILPLAP-----                         | ISQFSKWKI-----                            | PKQGF-----                        |
| TBSV          | <i>Tombusvirus</i>    | 32          | -----                         | EDQEVPLP-----                          | SNFLTQVVG-----                            | LSGY-----                         |
| ToTV          | <i>Torradovirus</i>   | 66          | -----                         | KKAMELFD-----                          | PEDVHNITSLWSSPKKFTTSS-----                | RDHGNLF-----                      |
| CaMV          | <i>Caulimovirus</i>   | 97          | -----                         | GKVVPLIIT-----                         | KEEINKRLSS-----                           | LKPEV-----                        |
| CMV           | <i>Cucumovirus</i>    | 52          | -----                         | AISVRPLV-----                          | EVTHGRIASF-----                           | FKSGYDVG-----                     |
| AMV           | <i>Alfamovirus</i>    | 60          | -----                         | APVVLVLSV-----                         | KEKKSILNRM-----                           | LPKIG-----                        |
| LNyV          | <i>Cytohabdovirus</i> | 53          | -----                         | IMRQVPLFD-----                         | KEDLDAMK-----                             | SDT-----                          |
| AcVB          | <i>Vitivirus</i>      | 78          | -----                         | VDQNILVD-----                          | EKTIDGLN-----                             | BEKQPY-----                       |
| CaLCuV        | <i>Begomovirus</i>    | 38          | -----                         | LTEILQF-----                           | PSTAAQFT-----                             | ARL-----                          |
|               |                       |             |                               |                                        |                                           | NRSC-----                         |
|               |                       |             |                               |                                        |                                           | MKIDHCVIEYRQQ                     |
|               |                       |             | eeeeee                        | ee eeeee                               | eeee                                      |                                   |
| TSWV          | <i>Tospovirus</i>     |             | IPN----                       | PTGKLVVALVDPNMPS-----                  | EKQVI-LKQGTITDP-----                      | ICFVF---YLN--                     |
| RCNMV         | <i>Dianthovirus</i>   |             | IGV----                       | APGHVTVELINPNVEG-----                  | PFQVMSGTLSWSPGAGK-----                    | PCMLIF---SVH--                    |
| SBWMV         | <i>Furovirus</i>      |             | VPM----                       | GYAGTVEVSLDLSGLSP-----                 | LENVIPDQTMMLGKGP-----                     | NVMCF---FMH--                     |
| CMoV          | <i>Umbravirus</i>     |             | VPD----                       | TSPQAVIVVHDTALPG-----                  | LEPIGTGQKVCIPLSSGP-----                   | RLVAF---YFN--                     |
| CNSV          | <i>Nepovirus B</i>    |             | LPQ----                       | QMNAYAFCVIMWGHSSD-----                 | AQEAAALSGSYVYLDGGE-----                   | ATMLQ---LPL--                     |
| RSV           | <i>Tenuivirus</i>     |             |                               | RASGITTLRIIDKSYVN-----                 | PSDQVEVEVRYPIKSNF-----                    | AVLGS---LAN--                     |
| ACLSV         | <i>Tricovirus</i>     |             | FRK----                       | NAGVSGVCYVYDNRWET-----                 | FEQAMLQKFHFNLDSGS-----                    | ATLVT---SPN--                     |
| SDV           | <i>Sadwavirus</i>     |             | VLT----                       | GVDTAMAIMVSDASHDR-----                 | LEEGFLSLTILRLGAGW-----                    | MRHTI---PIG--                     |
| PYMoV         | <i>Badnavirus</i>     |             | HRK----                       | EEGTLALVFRDNRWKG-----                  | DKGII-ATMEVDLTGKC-----                    | QMVYI---IPD--                     |
| CLBV          | <i>Citriovirus</i>    |             | LPS----                       | GNQIWRGRCALVDTSRTR-----                | AETAVI-DEFEFKFTKKQP-----                  | ASKLLTINAAVDI---                  |
| PYFV          | <i>Sequivirus</i>     |             | MHQ----                       | GDSRECIIMYLCDRRFKD-----                | PLLAGAI-ALIGFTLPGMQTHVYKTRMMAF-----       | AVLGS---SRK--                     |
| RBDV          | <i>Idaeovirus</i>     |             | VGK----                       | GTPGTARIKIRIDARLDD-----                | GYGELF-SSENVRVDSG-----                    | VIYCI---NVG--                     |
| RRV           | <i>Emaravirus</i>     |             | SK----                        | RFNEMATLLMDEFRDDG-----                 | IKQGGKELL-AQGKLNLDLMG-----                | TVITAVKDFNPFQ---                  |
| TMV           | <i>Tobamovirus</i>    |             | LPD----                       | NCRGVSVCVLDKRMER-----                  | ADEATL-GSYYTAAAKR-----                    | FQFKV---VFN--                     |
| CPsV          | <i>Ophiovirus</i>     |             | FSRV---                       | DGNGEITVSLIDDGKEA-----                 | AGQDPII-QSITFDASQM-----                   | AMVEL---SMN--                     |
| CPMV          | <i>Comovirus</i>      |             | ASP----                       | ESDLMGGFLLVDSLHTD-----                 | TANAIR-SIFVAPMRGGR-----                   | PVRVVT---FPN--                    |
| CiLV-C        | <i>Cilevirus</i>      |             | IA----                        | LPAELSLKLVDSAN-----                    | ILEAVN-QEVTNSTGGP-----                    | CVVVM---NCA--                     |
| <b>PrLbAV</b> |                       |             | LAE----                       | SSGMRRTSFSDVDAQ-----                   | PSFGI-DRFLADQAN-----                      | TLSII---SSG--                     |
| CRLV          | <i>Cheravirus</i>     |             | VGQ----                       | GTPLLAMCGIMDSRTDD-----                 | PNEALQ-VAGYFDLGRDR-----                   | CDLIS---LPL--                     |
| GFLV          | <i>Nepovirus A</i>    |             | GMP----                       | GNPDTLVVATYGHEDR-----                  | MTRAFI-GSASTFLGNGL-----                   | ARAFI---FFG--                     |
| OuMV          | <i>Ourmiavirus</i>    |             | VAT----                       | GLARGQIAVVDTRVNHTSIEDLMHKKALW-----     | KTAPVDLGCY-----                           | TIQGT---VP--                      |
| PoLV          | <i>Aureovirus</i>     |             | ISE----                       | RAQVRGVKLVDSRDL-----                   | PSRELY-RSKEFNIGHGL-----                   | VIEGS---QLP--                     |
| TBSV          | <i>Tombusvirus</i>    |             | VSR----                       | KAGVSGKLYLRDISDT-----                  | TGRKLH-CTESLDLGREI-----                   | RLTMQ---HLD--                     |
| ToTV          | <i>Torradovirus</i>   |             | VHG----                       | GEGSVKISLCSNSDPTN-----                 | PVL-QEKVLYFSGGA-----                      | QAVLM---SPT--                     |
| CaMV          | <i>Caulimovirus</i>   |             | FRN----                       | GIDTPKIALIDDRINS-----                  | RRDCLL-GAAGKNLAYGK-----                   | FMFTV---YPK--                     |
| CMV           | <i>Cucumovirus</i>    |             | VST----                       | DAEGSLRIYLADLGDKE-----                 | LSPIDG-QCVSLHNHDL-----                    | ALVSF---QPT--                     |
| AMV           | <i>Alfamovirus</i>    |             | ILK----                       | SSSGSITLKLFEATGE-----                  | LVD-VDTDHDTQA-----                        | CIFAG---RYP--                     |
| LNyV          | <i>Cytohabdovirus</i> |             | LHQRYMKNFGKTAGNCAIDSTFRK----- | VDQSII-SLHKYDLRSGR-----                | ADYVS---YFN--                             |                                   |
| AcVB          | <i>Vitivirus</i>      |             | GR----                        | AMKGTQIKVEDQRFKE-----                  | GHGTQ-CSFKCDLKDAL-----                    | SAYAS---FFG--                     |
| CaLCuV        | <i>Begomovirus</i>    |             | VPI----                       | NATGSVIVEIHDKRMTD-----                 | DESLQ-ASWTFPLRCNI-----                    | DLHYF---SSS--                     |
|               |                       |             | eee                           | eeeeeee                                | eeeeee                                    |                                   |
| TSWV          | <i>Tospovirus</i>     |             | -----                         | WSIPKMNTNTP-----                       | ENCCQLHLMCSQ-EYKKG-VSFGVMSYVSW-----       |                                   |
| RCNMV         | <i>Dianthovirus</i>   |             | -----                         | HQLNSDH-----                           | EPRVRVINTGT-IPTK-KSYARCHAYW-----          |                                   |
| SBWMV         | <i>Furovirus</i>      |             | -----                         | YSIPLNDKGR-----                        | AVKLAFKIDAEM-ASKG-MSVMNVYSYV-----         |                                   |
| CMoV          | <i>Umbravirus</i>     |             | -----                         | LCEYPLSDSAMN-----                      | APRCFSLVTLQEGVRLEQG-ASAFSLYSMW-----       |                                   |
| CNSV          | <i>Nepovirus B</i>    |             | -----                         | LYEYVGHNLQDF-----                      | EAYKRSVLVSTVPEFSGIADGKAMFGITSIEF-----     |                                   |
| RSV           | <i>Tenuivirus</i>     |             | -----                         | FLALEDK-----                           | HNLQVSVSDSSVQNC-VISRTLWFV-----            |                                   |
| ACLSV         | <i>Tricovirus</i>     |             | -----                         | FPVSLDDPGL-----                        | SNSISVAVMFENLNFKE-SYPISVRVGN-----         |                                   |
| SDV           | <i>Sadwavirus</i>     |             | -----                         | ITVFTDPLV-----                         | DRFLRLSVLTGGSPMADG-RQVARLHYGL-----        |                                   |
| PYMoV         | <i>Badnavirus</i>     |             | -----                         | IMMVTNDFY-----                         | HNTHISVLTTRGVEGWQHEANLLVTRGM-----         |                                   |
| CLBV          | <i>Citriovirus</i>    |             | -----                         | NCKVSVG-----                           | SIQVLELHGVDLREE-RSVAALII-----             |                                   |
| PYFV          | <i>Sequivirus</i>     |             | -----                         | EATAAD-----                            | RLQVLYVKGAKLERTONTPTVNVRT-----            |                                   |
| RBDV          | <i>Idaeovirus</i>     |             | -----                         | YSVPKSEI-----                          | DYKINIDFAGVPIKDG-KSPIWVKAFF-----          |                                   |
| RRV           | <i>Emaravirus</i>     |             | -----                         | QFVTGSLDFATDKDI-----                   | NKIKFYISFPDTRM-----                       |                                   |
| TMV           | <i>Tobamovirus</i>    |             | -----                         | YAITTQDAM-----                         | KNVQVVLVNIIRNVKMSAG-FCPLSLEFVSVCIIVY----- |                                   |
| CPsV          | <i>Ophiovirus</i>     |             | -----                         | FFVEKKDM-----                          | DFIGIHVSAENVPVQD-RAYGSINLAF-----          |                                   |
| CPMV          | <i>Comovirus</i>      |             | -----                         | TLAPVSCDL-----                         | NNRFKLCISLPNCDIVQG-SQVAEVSVN-----         |                                   |
| CiLV-C        | <i>Cilevirus</i>      |             | -----                         | HISPNEDRTHVNG-----                     | SEVHRRLLGIYQVDCDNISGR-VTTFSTITALW-----    |                                   |
| <b>PrLbAV</b> |                       |             | -----                         | NDSDHKSNS-----                         | TPQPELSFIFGLPKV-----                      | TPITQA-----                       |
| CRLV          | <i>Cheravirus</i>     |             | -----                         | INFLPNKEDFD-----                       | DYMRGLYLCTMFHNVRGQFNKALCSYSA-----         |                                   |
| GFLV          | <i>Nepovirus A</i>    |             | -----                         | LQYQSEPRR-----                         | ESIRLVASTNATVTD-SVLAALISVGT-----          |                                   |
| OuMV          | <i>Ourmiavirus</i>    |             | -----                         | YCLFHPKKEGGDKSLESQNPRIIRGVIYDTSRY----- |                                           |                                   |
| PoLV          | <i>Aureovirus</i>     |             | -----                         | FCLPVG-----                            | DYPLQFVTVLQSQFRET-ANLYSTSVEM-----         |                                   |
| TBSV          | <i>Tombusvirus</i>    |             | -----                         | FSVSTRSD-----                          | VPIVFGFEELVSPFLEG-RELFSISVRW-----         |                                   |
| ToTV          | <i>Torradovirus</i>   |             | -----                         | ITLFPVKRG-----                         | PMFYIMECLGTRA-----                        | QIPCSVVAIW-----                   |
| CaMV          | <i>Caulimovirus</i>   |             | -----                         | FGISLNTQRL-----                        | NQTLSLIHDFENKLNKMGDKVMTITYV-----          |                                   |
| CMV           | <i>Cucumovirus</i>    |             | -----                         | YDCPMETVGN-----                        | RRKCFVAVIERHGYIQT-GTTASVCSNW-----         |                                   |
| AMV           | <i>Alfamovirus</i>    |             | -----                         | RSILAKDAK-----                         | GHDKLVVHAVASTNAN-SAVGVLYPIW-----          |                                   |
| LNyV          | <i>Cytohabdovirus</i> |             | -----                         | HCLSLDPMI-----                         | QKRLSVLLGIKIGDVEPG-VELFSICIGY-----        |                                   |
| AcVB          | <i>Vitivirus</i>      |             | -----                         | YFVSTTDVKN-----                        | GVALNKLKVAEGMCMVEG-VHPLSIQMH-----         |                                   |
| CaLCuV        | <i>Begomovirus</i>    |             | -----                         | FFSLKDP-----                           | IPKLYRVSVDTNVHQ-RTHFAFKGK-----            |                                   |

**Figure S3.** Multiple sequence alignment of movement proteins from PrLbAV and plant viruses of the 30K superfamily. Sequences are from representative members of the virus genera in

the 30K superfamily. PrLBaV is underlined. The GenBank identifier, virus genus and the distance in aminoacids from the N-terminus of the protein are shown on the right side of each sequence. Consensus secondary structure elements, predicted by PSIREN within PROMALS3D program, are reported on the top with strands and helices indicated with e and h, respectively. The nearly invariant aspartic acid residue (the D motif) is in bold.
